# Supplementary material for: Antioxidants Improve the Viability of Stored Adult Retinal Pigment Epithelial-19 Cultures
Source: Springer Nature journal article supplement (doi:10.1007/s40123-014-0024-9), 2014-03-28
Supplement: MOESM1 [file 9339978]

- Recent advances in ocular regenerative research suggest the replacement of the retinal pigment epithelium (RPE) as the most promising treatment option for age-related macular degeneration.
- With treatment strategies improving, there is likely to be a need for improved storage methods for cultured RPE cells in the future.
- In a previous study, we showed that storage of adult RPE (ARPE)-19 cultures in serum free minimum essential medium (MEM) was optimal at 16°C.
- The present study aimed at improving the preservation of ARPE-19 cultures by supplementing MEM with storage medium additives.
- The viability of ARPE-19 cell cultures can be increased by the addition of [D-Ala<sup>2</sup>, D-Leu<sup>5</sup>]-Enkephalin (DADLE), capsazepine, docosahexaenoic acid (DHA) or resveratrol to the storage medium without perturbing apoptosis or differentiation.

This summary slide represents the opinions of the authors. For a full list of acknowledgments and conflicts of interest for all authors of this article, please see the full text online. Copyright © The Authors 2014. Creative Commons Attribution Noncommercial License (CC BY-NC).
